# Supplementary material for: 7,7-difluoropentaphen-6(7H)-one
Source: Preprints.org preprint supplement (doi:10.20944/preprints202212.0005.v1), 2022-12-01
Supplement: Supplementary file 1 [file supplementary]

Supplementary Material:  
**7,7-difluoropentaphen-6(7*H*)-one**

Ok Ton Dyan <sup>1,2\*</sup>, Pavel A. Zaikin <sup>2</sup>

<sup>1</sup> Novosibirsk State University, 2 Pirogova Street, Novosibirsk 630090, Russia

<sup>2</sup> N.N. Vorozhtsov Novosibirsk Institute of Organic Chemistry Siberian Branch of Russian Academy of Sciences, 9 Lavrentiev Ave, Novosibirsk 630090, Russia; okton.d@gmail.com

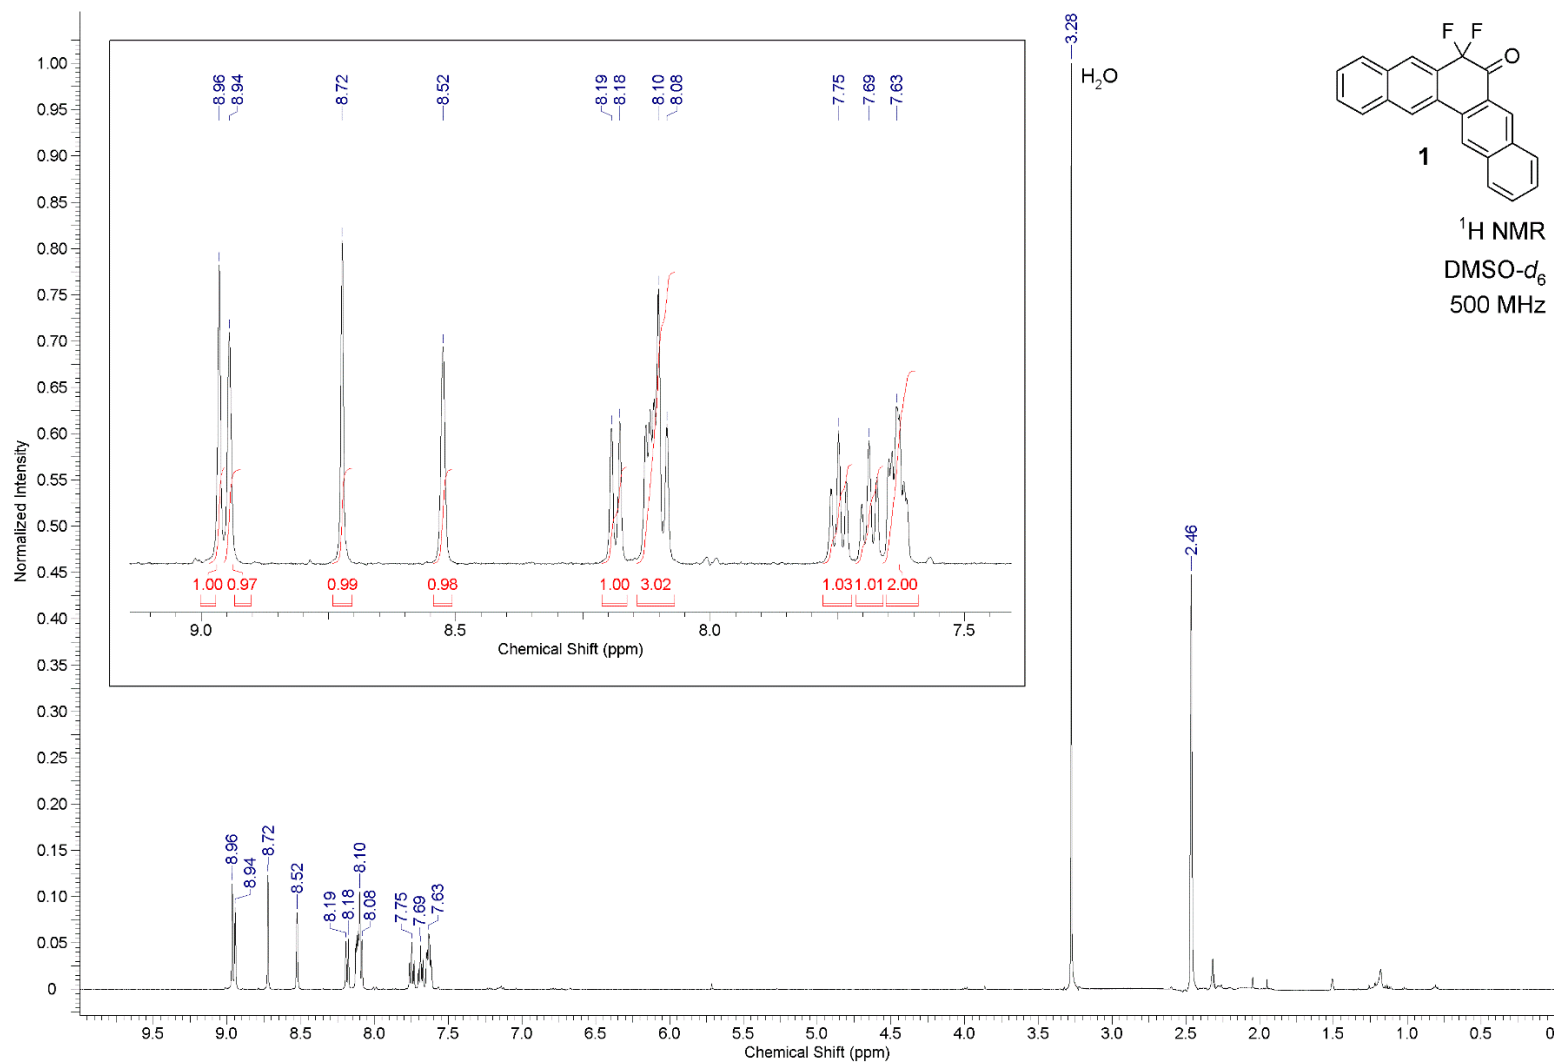

**Figure S1.** <sup>1</sup>H NMR spectrum of 7,7-difluoropentaphen-6(7*H*)-one **1**.

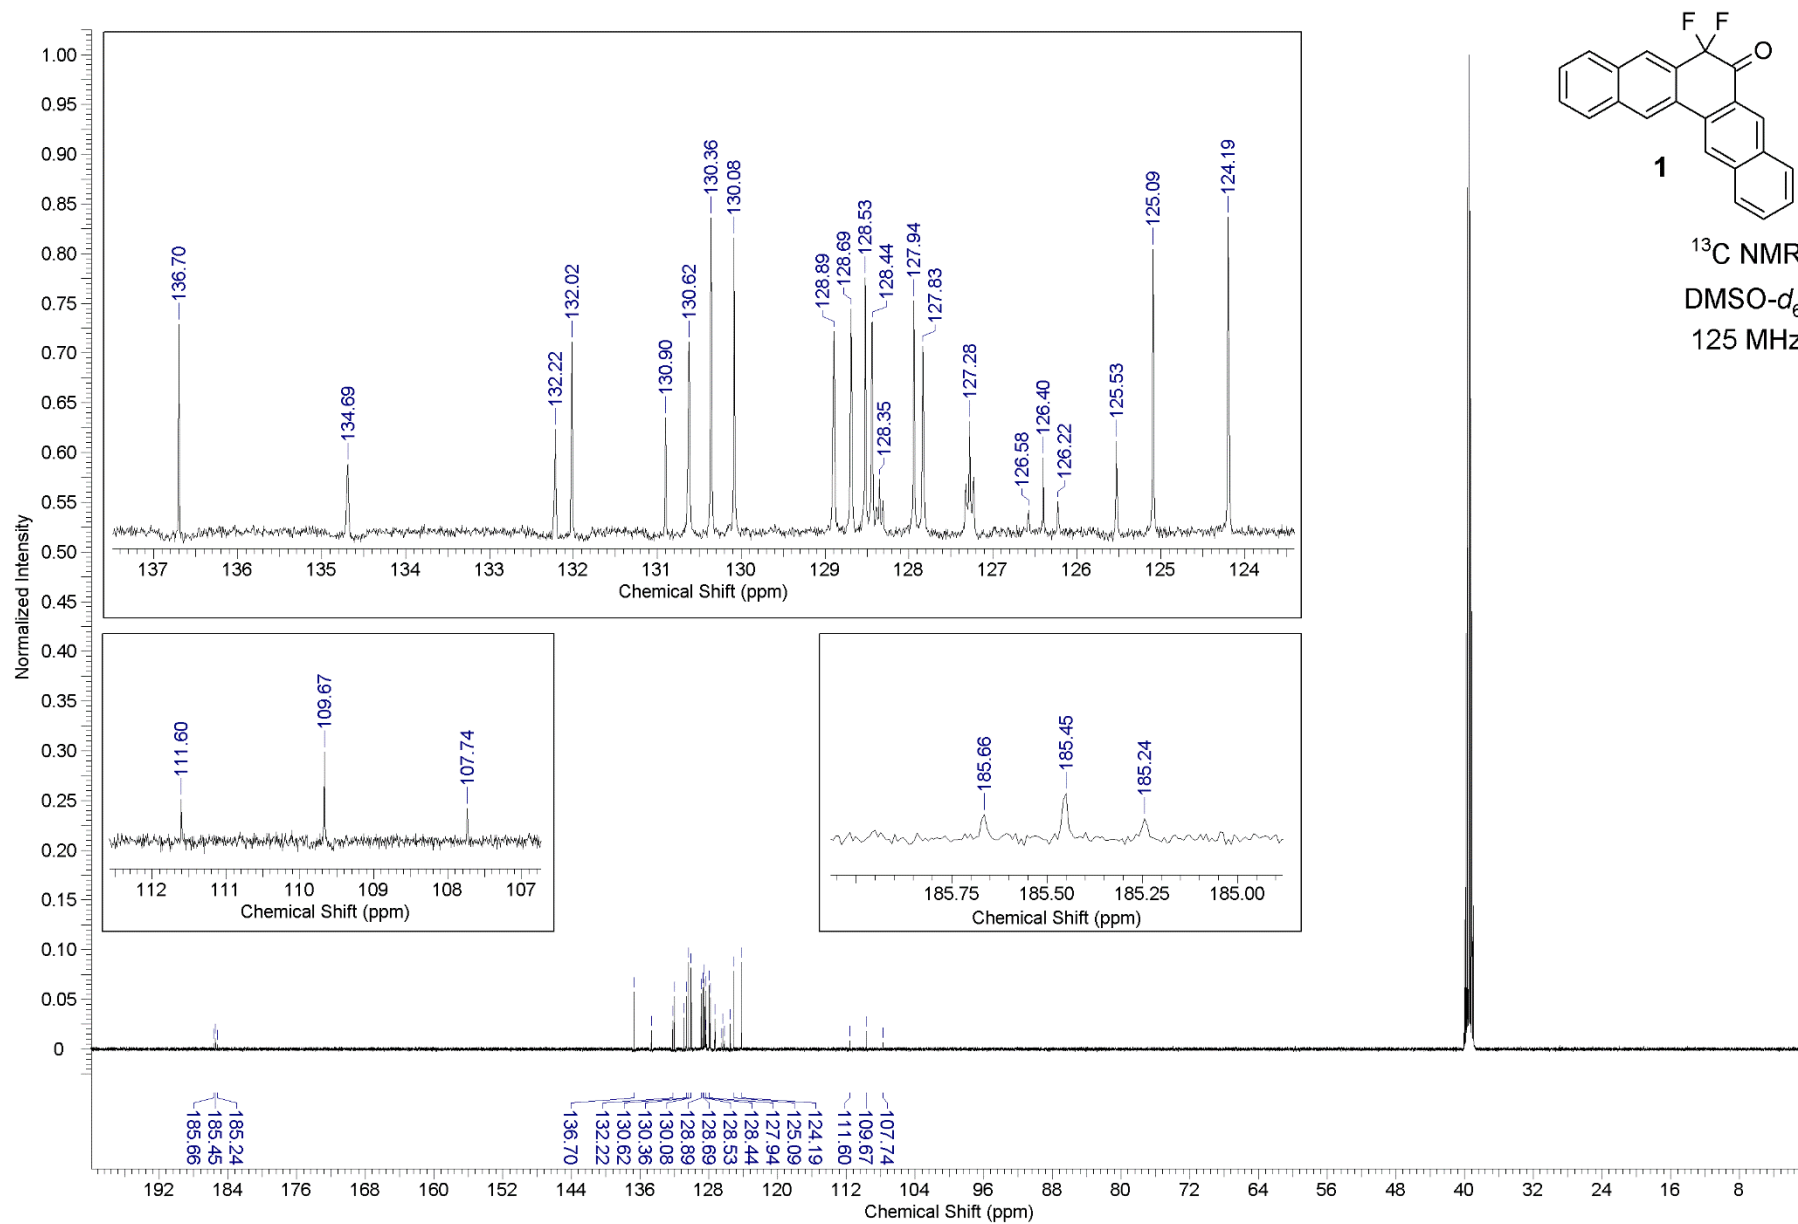

Figure S2.  $^{13}\text{C}$  NMR spectrum of 7,7-difluoropentaphen-6(7H)-one **1**.

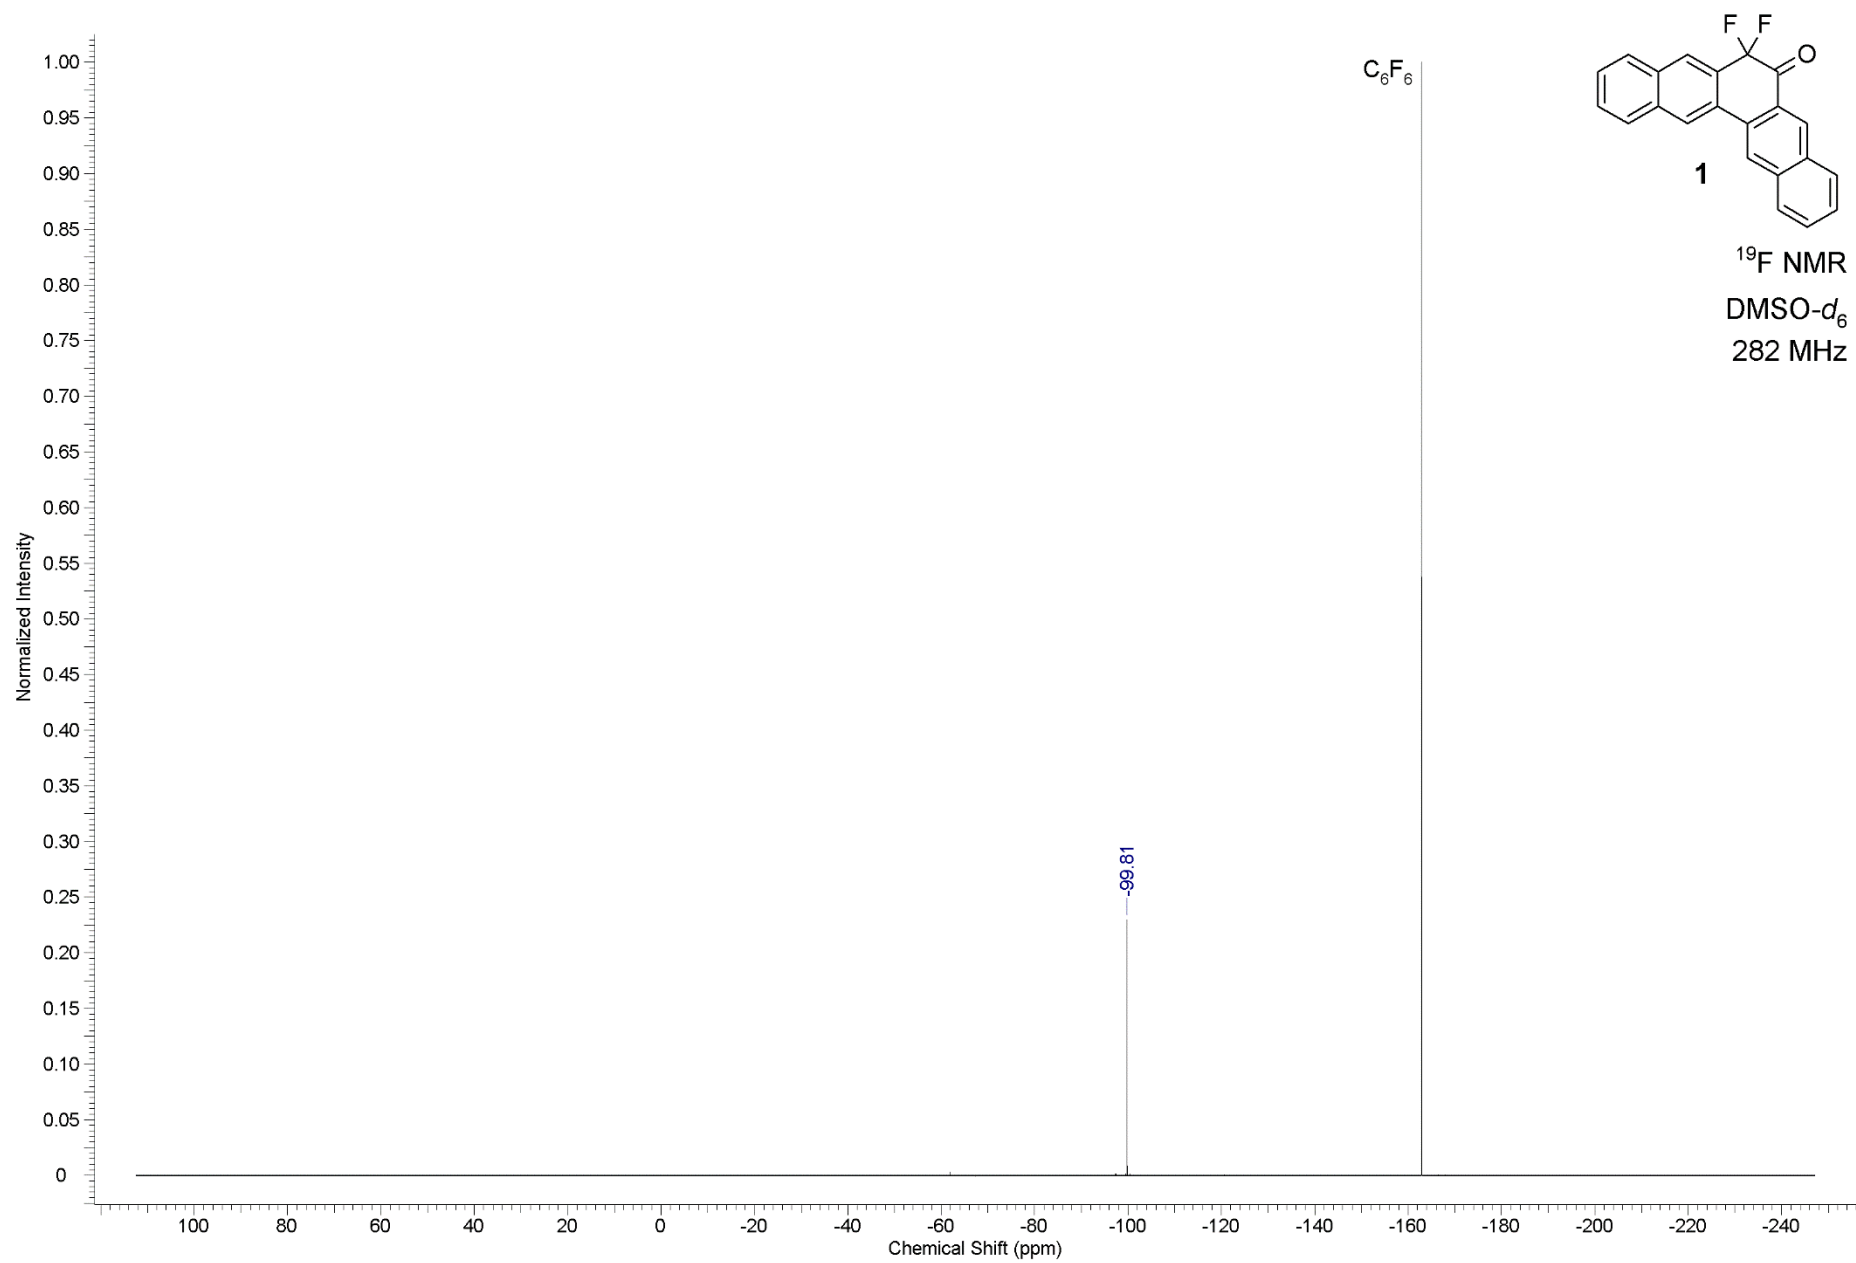

**Figure S3.** <sup>19</sup>F NMR spectrum of 7,7-difluoropentaphen-6(7*H*)-one **1**.

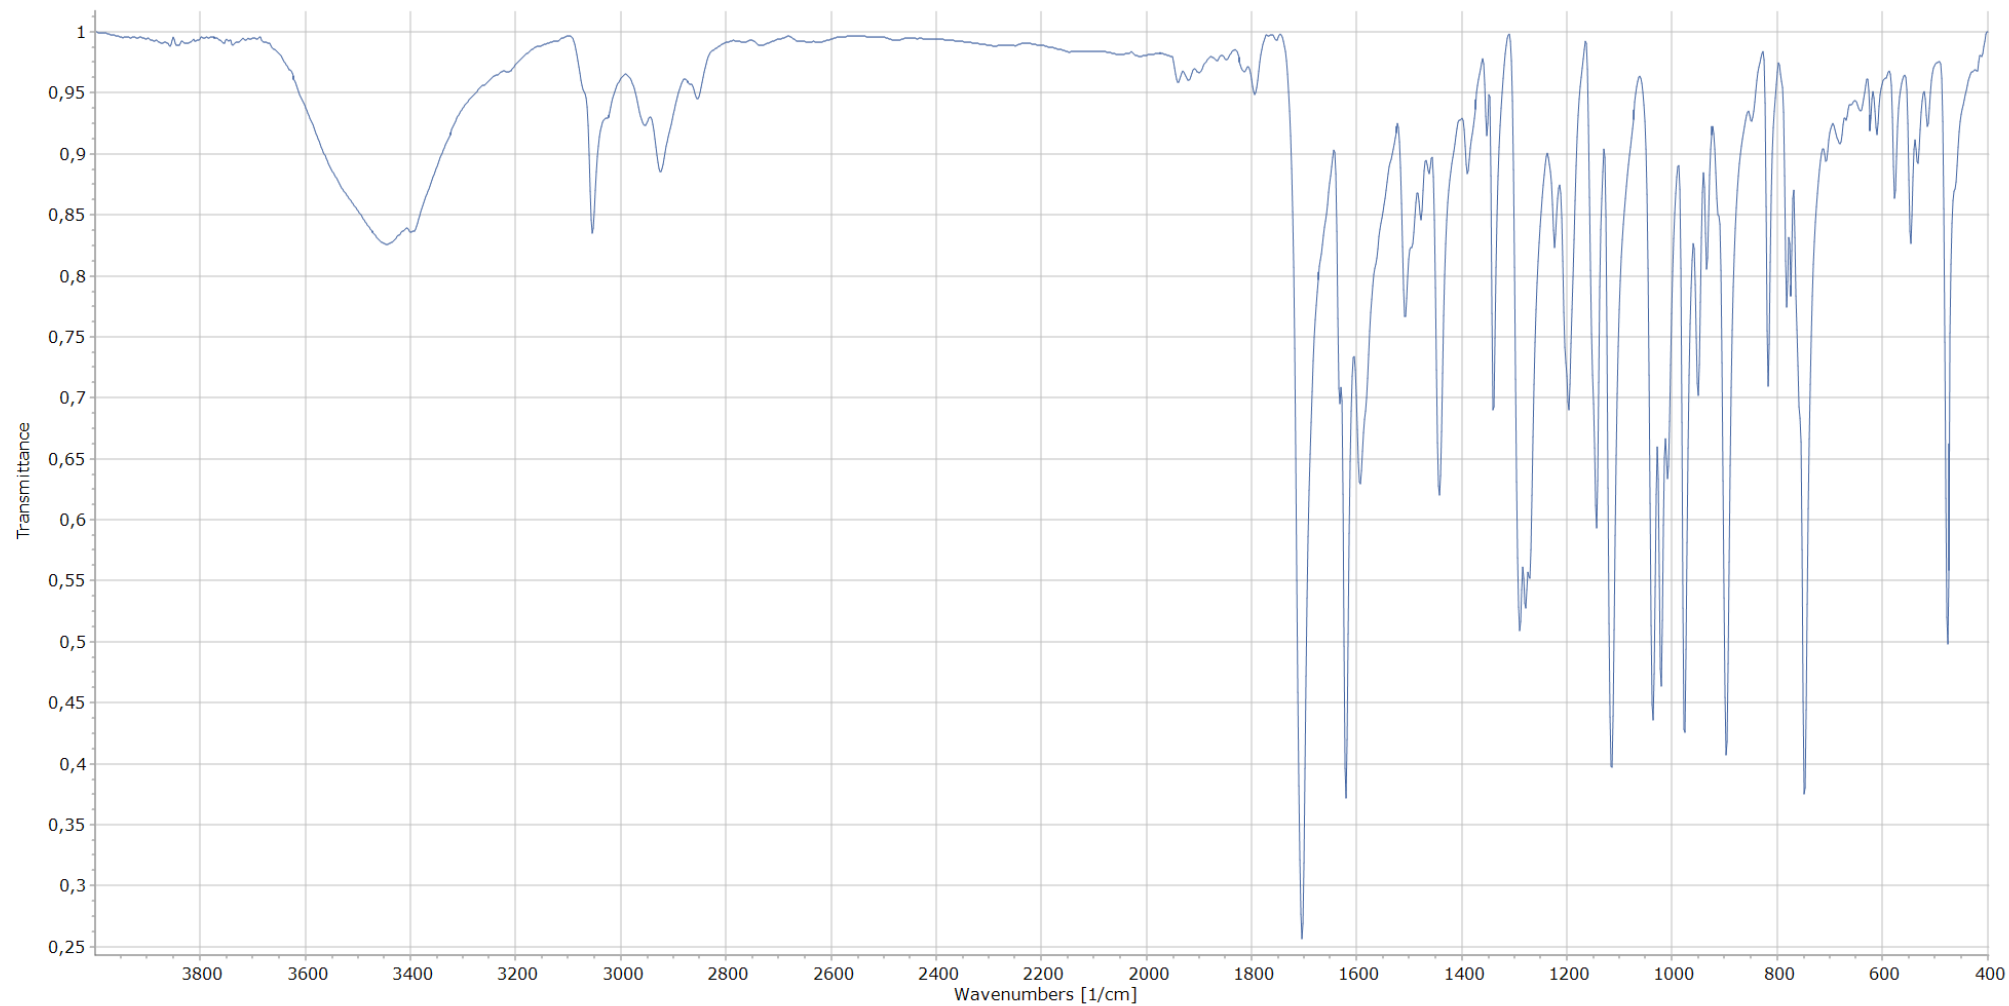

**Figure S4.** IR spectrum of 7,7-difluoropentaphen-6(7*H*)-one **1**.

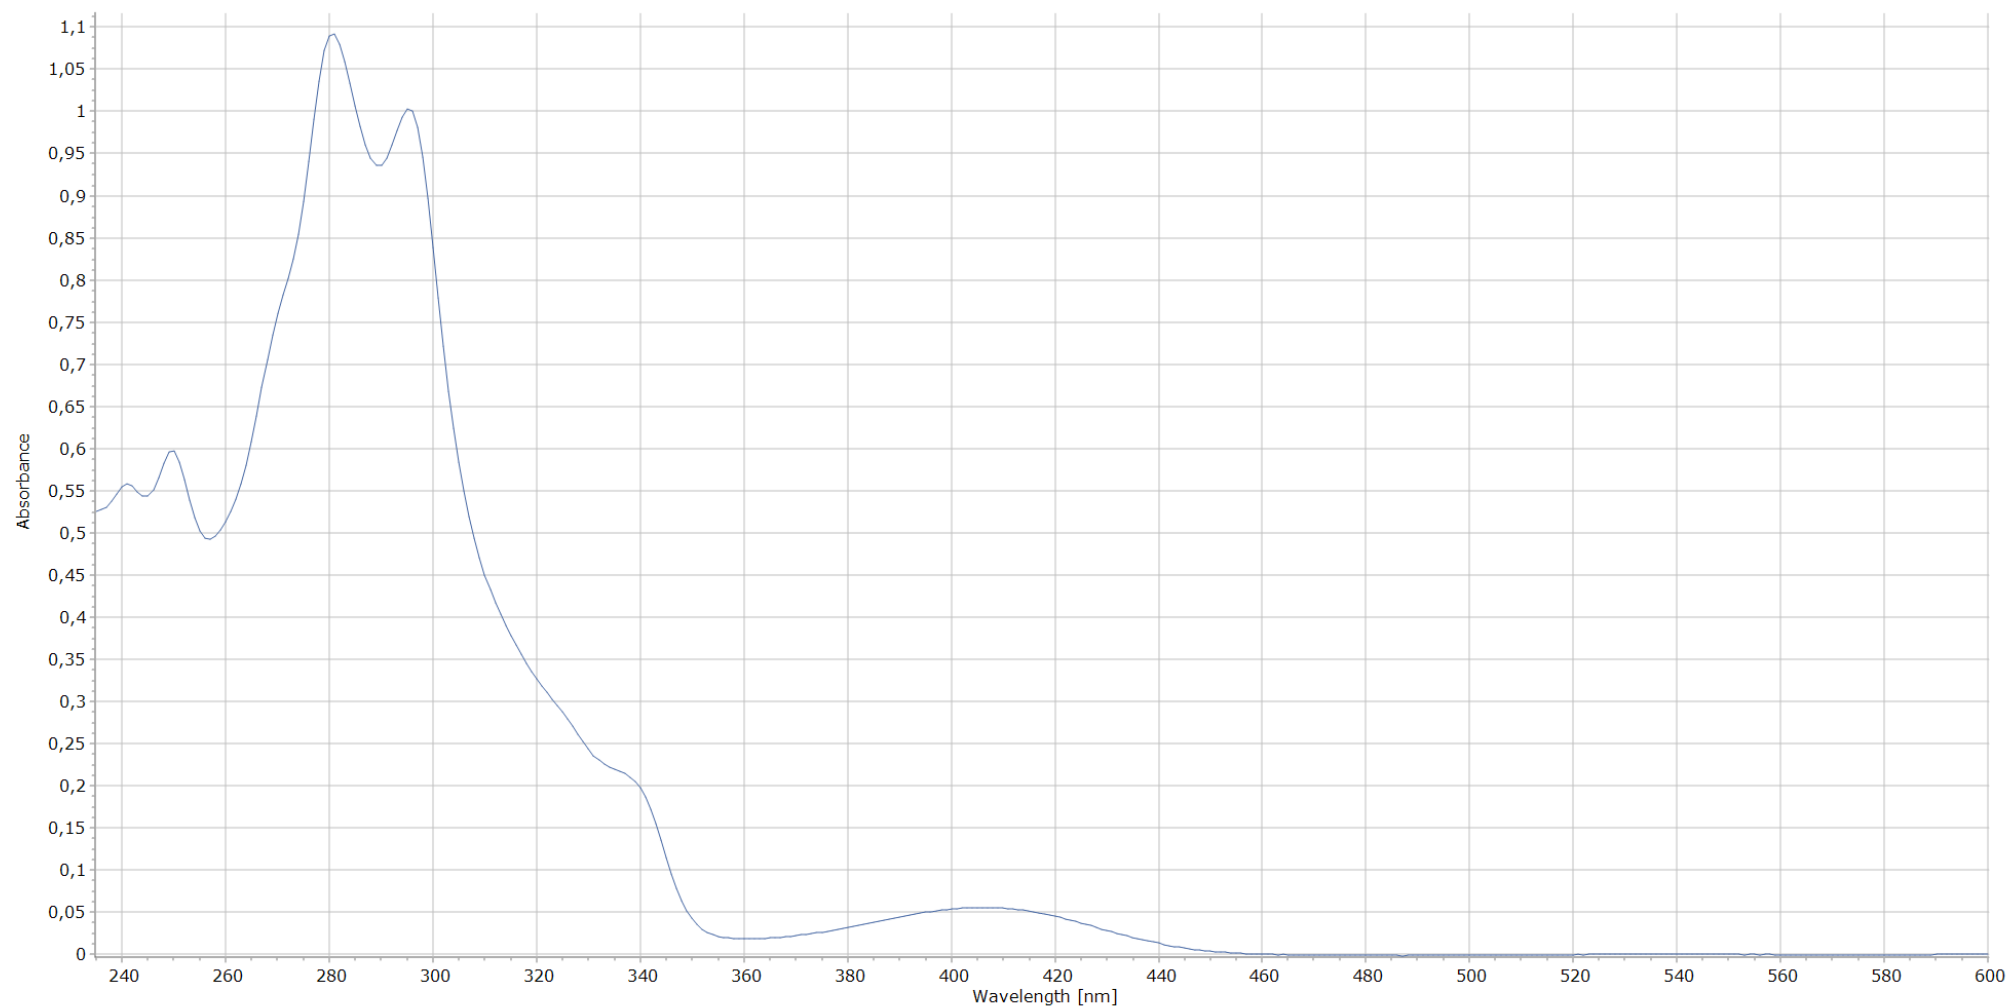

**Figure S5.** UV/Vis spectrum of 7,7-difluoropentaphen-6(7H)-one **1**.

SD-365 #10 RT: 0.66 AV: 1 NL: 1.21E7  
T: + c EI Full ms [14.50-360.50]

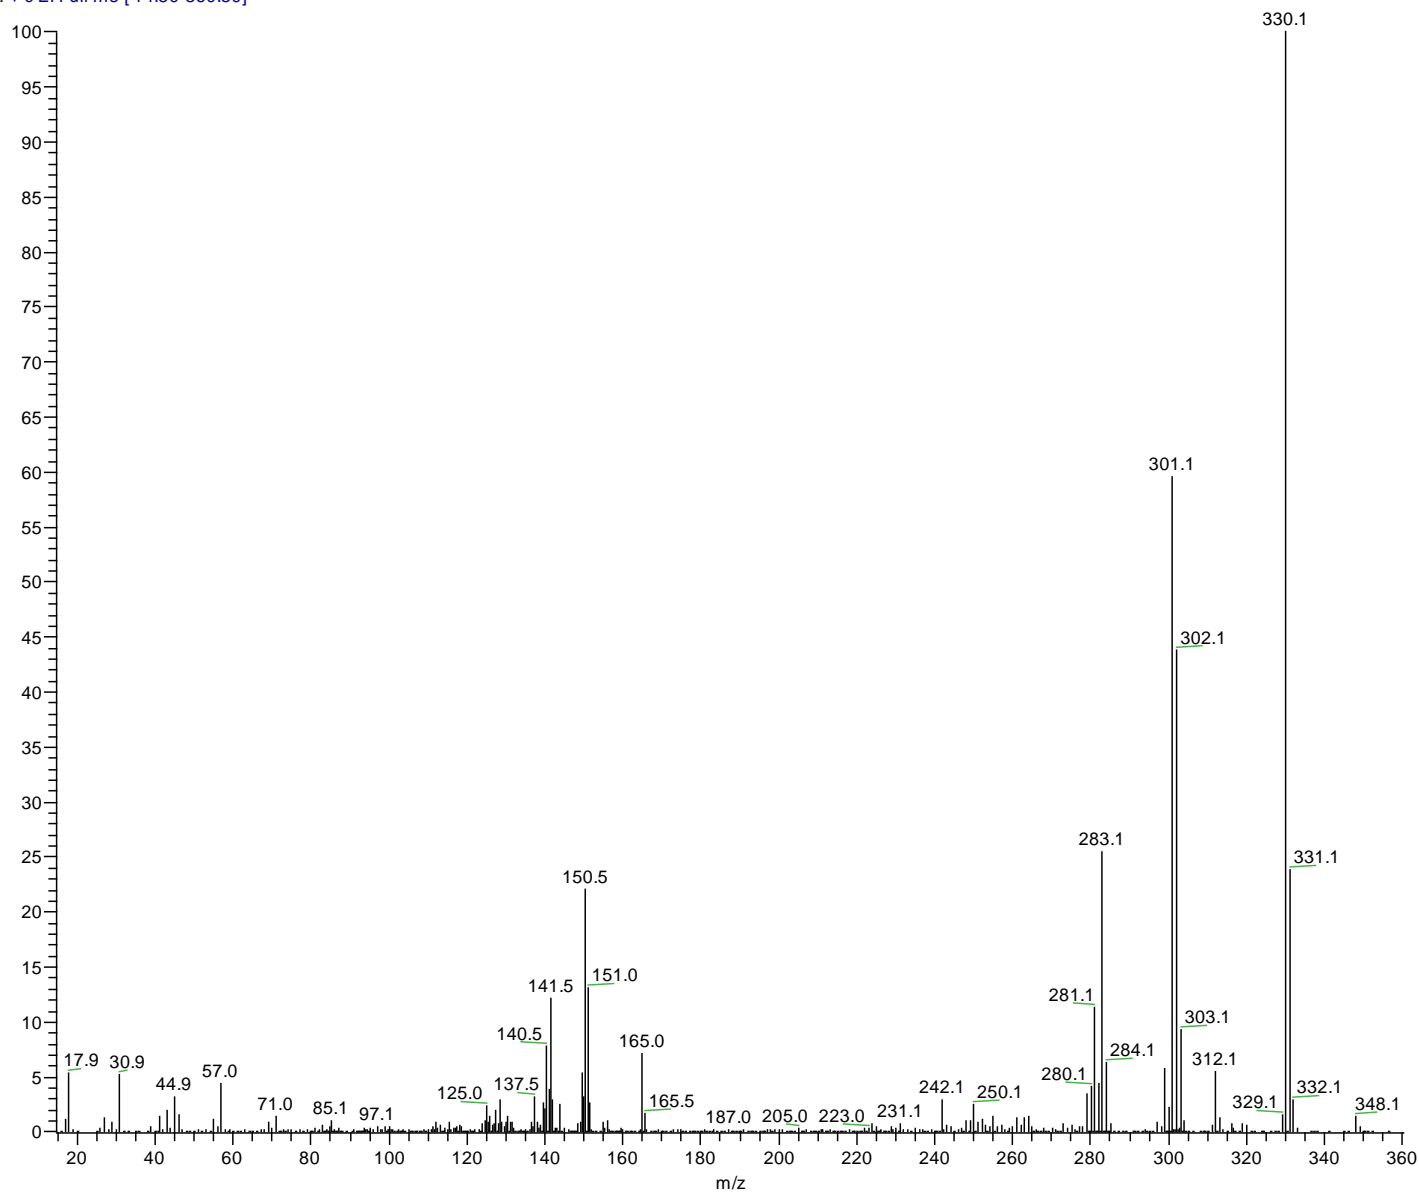

**Figure S6.** Mass spectrum of 7,7-difluoropentaphen-6(7*H*)-one **1**.
